# Supplementary material for: 3D Carbon Nanonetwork Coated Composite Electrode with Multi-Heteroatom Doping for High-Rate Vanadium Redox Flow Batteries
Source: MDPI journal article supplement (doi:10.3390/polym14235269), 2022-12-02
Supplement: s1 [file s1]

## Supporting Information

### **3D Carbon Nanonetwork Coated Composite Electrode with Multi-heteroatom Doping for High-rate Vanadium Redox Flow Batteries**

Wei Ling <sup>1</sup>, Xiongwei Wu <sup>2,\*</sup> and Funian Mo <sup>1,\*</sup>

<sup>1</sup> School of Materials Science and Engineering, Harbin Institute of Technology (Shenzhen),  
Shenzhen 518055, PR China

<sup>2</sup> School of Chemistry and Materials Science, Hunan Agricultural University, Changsha  
410128, P. R. China

\* Correspondence: wxw@hunau.edu.cn; e-mail.com (X.W); mofunian@hit.edu.cn (F.M.)\*  
E-mail: yanhuanglib@hit.edu.cn.

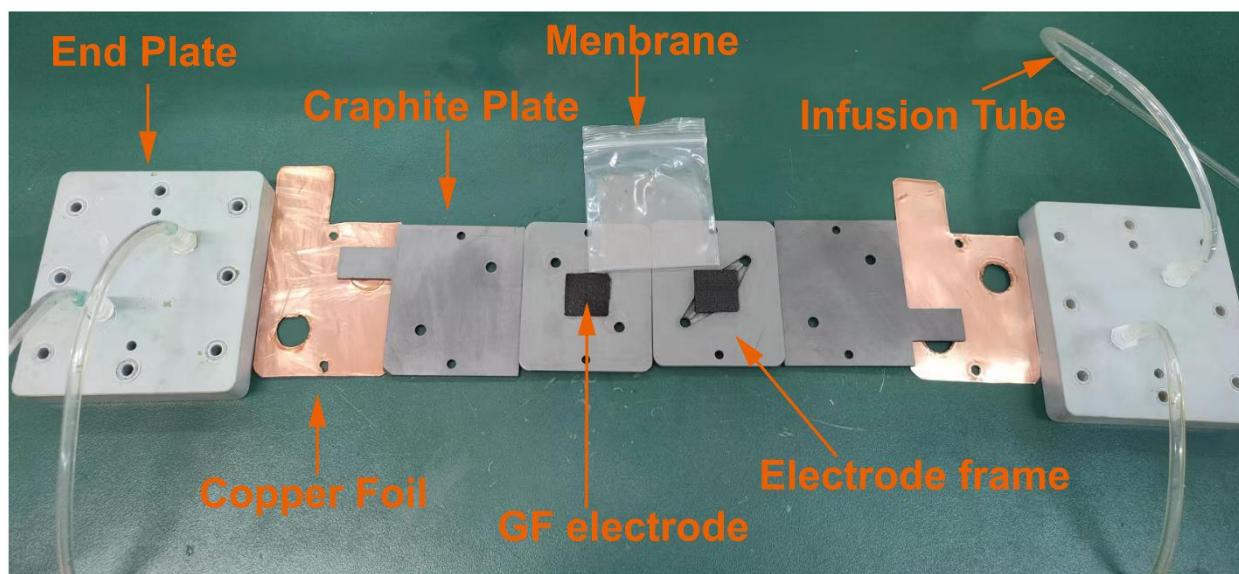

**Figure S1.** The design/structure of the flow battery.

**Table S1.** Comparison of the rate capability of the GF@PCNs electrode with previous work on electrodes materials for VRFBs

| Reference                                  | Electrode              | Current density<br>(mA cm <sup>-2</sup> ) | Discharge capacity<br>(Ah L <sup>-1</sup> ) | Energy<br>efficiency       | Maximum<br>Current<br>density<br>(mA cm <sup>-2</sup> ) |
|--------------------------------------------|------------------------|-------------------------------------------|---------------------------------------------|----------------------------|---------------------------------------------------------|
| <b>This work</b>                           | <b>GF@PCNs-900</b>     | <b>250</b><br><b>400</b>                  | <b>17.1</b><br><b>5.0</b>                   | <b>68.0</b><br><b>54.0</b> | <b>400</b>                                              |
| [1]Adv. Funct. Mater., 2019, 1903192       | Exfoliated-GF          | 100<br><u>200</u>                         | 21.0<br><u>10.0</u>                         | 86.4<br><u>60.0</u>        | 200                                                     |
| [2]J. Mater. Chem. A, 2019, 7, 5589-5600   | NiCoO <sub>2</sub> /GF | 100<br><u>150</u>                         | Not Given                                   | 73.7<br><u>72.5</u>        | 150                                                     |
| [3]Nano Energy, 2018, 43, 55-62            | PGF                    | 150<br><u>200</u>                         | 28.0<br><u>24.0</u>                         | 73.0<br><u>68.0</u>        | 300                                                     |
| [4]Energy Storage Mater., 2018, 13, 66-71. | GO-rGO/GF              | 50<br><u>100</u>                          | Not Given                                   | 87.0<br><u>65.0</u>        | 100                                                     |
| [5]J. Mater. Chem. A, 2018, 6, 6625-6632.  | TiC-GF                 | 80<br><u>100</u>                          | <u>26</u>                                   | 67.0<br><u>62.0</u>        | 100                                                     |
| [6]Chem. Eng. J., 2022, 450, 138377.       | Bio-CF                 | 100                                       | Not Given                                   | <u>82</u>                  | 100                                                     |
| [7]Appl. Surf. Sci., 2021, 546, 148941.    | B-CF                   | 60<br><u>100</u>                          | Not Given                                   | 85.0<br><u>80.0</u>        | 300                                                     |
| [8]Nano Energy, 2016, 28, 19-28.           | NCS/GF                 | 150<br><u>200</u>                         | <u>27.0</u><br>23.0                         | 71.0<br><u>67.0</u>        | 300                                                     |
| [9] ChemNanoMat, 2022, 8, e202200027..     | ASP-CF                 | 100<br><u>200</u>                         | Not Given                                   | 85.0<br><u>60.0</u>        | 250                                                     |
| [10]Adv. Sci., 2016, 3, 1500276            | CF-G-1                 | 25<br><u>125</u>                          | <u>20.5</u>                                 | 87.0<br><u>72.0</u>        | 125                                                     |

1. Mukhopadhyay, A.; Yang, Y.; Li, Y.; Chen, Y.; Li, H.; Natan, A.; Liu, Y.; Cao, D. and Zhu, H. Mass Transfer and Reaction Kinetic Enhanced Electrode for High - Performance Aqueous Flow Batteries. *Adv. Funct. Mater.*, **2019**, 29, 1903192.
2. Xiang, Y. and Daoud, W. A. Binary NiCoO<sub>2</sub>-Modified Graphite Felt as an Advanced Positive Electrode for Vanadium Redox Flow Batteries. *J. Mater. Chem. A*, **2019**, 7, 5589-5600.
3. Liu, Y.; Shen, Y.; Yu, L.; Liu, L.; Liang, F.; Qiu, X. and Xi, J. Holey-Engineered Electrodes for Advanced Vanadium Flow Batteries. *Nano Energy*, **2018**, 43, 55-62.
4. Hu, G.; Jing, M.; Wang, D.-W.; Sun, Z.; Xu, C.; Ren, W.; Cheng, H.-M.; Yan, C.; Fan, X. and Li, F. A Gradient Bi-Functional Graphene-Based Modified Electrode for Vanadium Redox Flow Batteries. *Energy Storage Mater.*, **2018**, 13, 66-71.
5. Ghimire, P. C.; Schweiss, R.; Scherer, G. G.; Wai, N.; Lim, T. M.; Bhattarai, A.; Nguyen, T. D. and Yan, Q. Titanium Carbide-Decorated Graphite Felt as High Performance Negative Electrode in Vanadium Redox Flow Batteries. *J. Mater. Chem. A*, **2018**, 6, 6625-6632.
6. Hu, Z.; Miao, Z.; Xu, Z.; Zhu, X.; Zhong, F.; Ding, M.; Wang, J.; Xie, X.; Jia, C. and Liu, J. Carbon Felt Electrode Modified by Lotus Seed Shells for High-Performance Vanadium Redox Flow Battery. *Chem. Eng. J.*, **2022**, 450, 138377.
7. Park, S. E.; Yang, S. Y. and Kim, K. J. Boron-Functionalized Carbon Felt Electrode for Enhancing the Electrochemical Performance of Vanadium Redox Flow Batteries. *Appl. Surf. Sci.*, **2021**, 546, 148941.
8. Wu, L.; Shen, Y.; Yu, L.; Xi, J. and Qiu, X. Boosting Vanadium Flow Battery Performance by Nitrogen-Doped Carbon Nanospheres Electrocatalyst. *Nano Energy*, **2016**, 28, 19-28.
9. Zhou, H.; Shen, Y.; Xi, J.; Qiu, X. and Chen, L. ZrO<sub>2</sub>-Nanoparticle-Modified Graphite Felt: Bifunctional Effects on Vanadium Flow Batteries. *ACS Appl. Mater. Interfaces*, **2016**, 8, 15369-15378.
10. Li, W.; Zhang, Z.; Tang, Y.; Bian, H.; Ng, T. W.; Zhang, W. and Lee, C. S. Graphene-Nanowall-Decorated Carbon Felt with Excellent Electrochemical Activity toward Vo<sub>2</sub><sup>+</sup>/Vo<sub>2</sub><sup>2+</sup> Couple for All Vanadium Redox Flow Battery. *Adv. Sci. (Weinh)*, **2016**, 3, 1500276.
